# Supplementary material
Source: PubMed Central journal article supplement (PMC9361817)
Supplement: aem.00325-22-s0001.pdf [file aem.00325-22-s0001.pdf]

## Supplementary Materials

**Title:** RasI/R quorum sensing system controls the virulence of  
*Ralstonia solanacearum* strain EP1

**Authors:** Jinli Yan<sup>1†</sup>, Peng Li<sup>2†</sup>, Xiaoqing Wang<sup>1</sup>, Minya Zhu<sup>1</sup>, Hongyu Shi<sup>1</sup>, Guohui Yu<sup>3</sup>, Xuemei Chen<sup>4</sup>, Huishan Wang<sup>1</sup>, Xiaofan Zhou<sup>1</sup>, Lisheng Liao<sup>1\*</sup>, Lianhui Zhang<sup>1, 3\*</sup>

Content: Table S3

Figures S1 – S6

Table S3. RT-qPCR validation of the genes differentially expressed in  $\Delta rasI$  and  $\Delta rasR$  compared with their parental WT EP1

| Gene ID     | RNAseq      | RT-qPCR     | RNAseq      | RT-qPCR     | Description                                     |
|-------------|-------------|-------------|-------------|-------------|-------------------------------------------------|
|             | <i>rasI</i> | <i>rasI</i> | <i>rasR</i> | <i>rasR</i> |                                                 |
| AC251_22465 | -5.032      | -7.052      | -1.469      | -4.479      | <i>rasI</i>                                     |
| AC251_00725 | -9.443      | -10.396     | -8.633      | -10.816     | fucose-binding<br>lectin II                     |
| AC251_00730 | -2.591      | -4.443      | -1.944      | -4.703      | <i>solR</i>                                     |
| AC251_19280 | -2.379      | -6.27       | -2.176      | -6.749      | Cellulase                                       |
| AC251_23955 | -1.839      | -2.513      | -1.862      | -2.739      | CpaF family protein<br>Type II/IV               |
| AC251_19340 | -4.330      | -5.136      | -4.133      | -5.303      | SAM-dependent<br>methyltransferase              |
| AC251_17135 | -3.204      | -2.051      | -2.921      | -2.228      | Universal stress<br>protein                     |
| AC251_23985 | -2.070      | -2.667      | -3.253      | -3.145      | Flp family type IVb<br>pilin                    |
| AC251_22035 | -2.602      | -2.463      | -2.779      | -3.126      | AraC family<br>transcriptional<br>regulator     |
| AC251_25945 | -2.374      | -3.034      | -2.665      | -3.583      | isopenicillin N<br>synthase family<br>oxygenase |

Figure S1

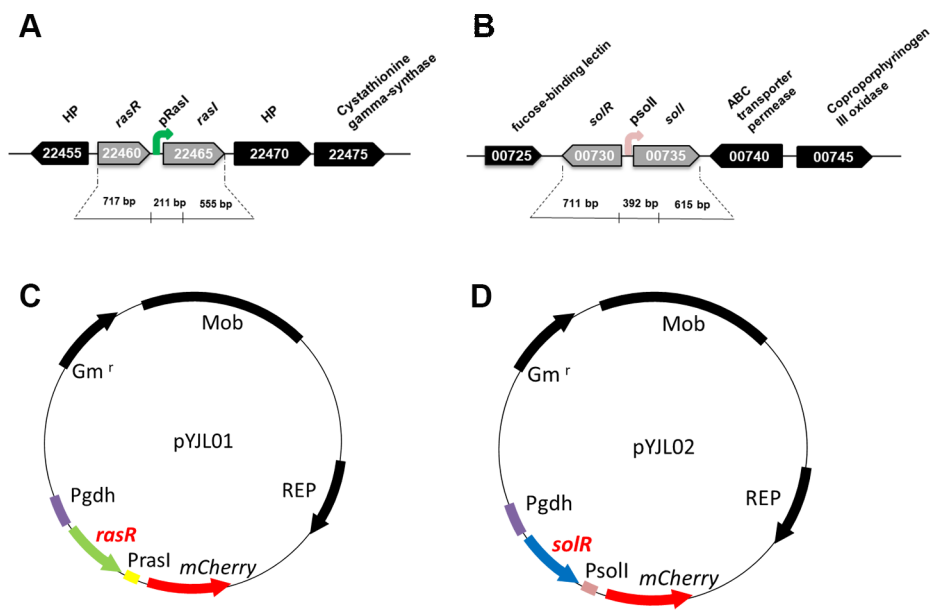

**Fig. S1. Construction of reporter strains for AHL QS signals in *R. solanacearum* EP1.** (A) The genetic organization of *rasI-rasR* and flanking genes, HP represent hypothetical protein. (B) The genetic organization of *solI-solR* and flanking genes. (C) Genetic map of the reporter construct pYJL01. Pgdh is a strong promoter for driving *rasR* or *solR* gene expression (1). (D) Genetic map of the reporter construct pYJL02.

**Figure S2**

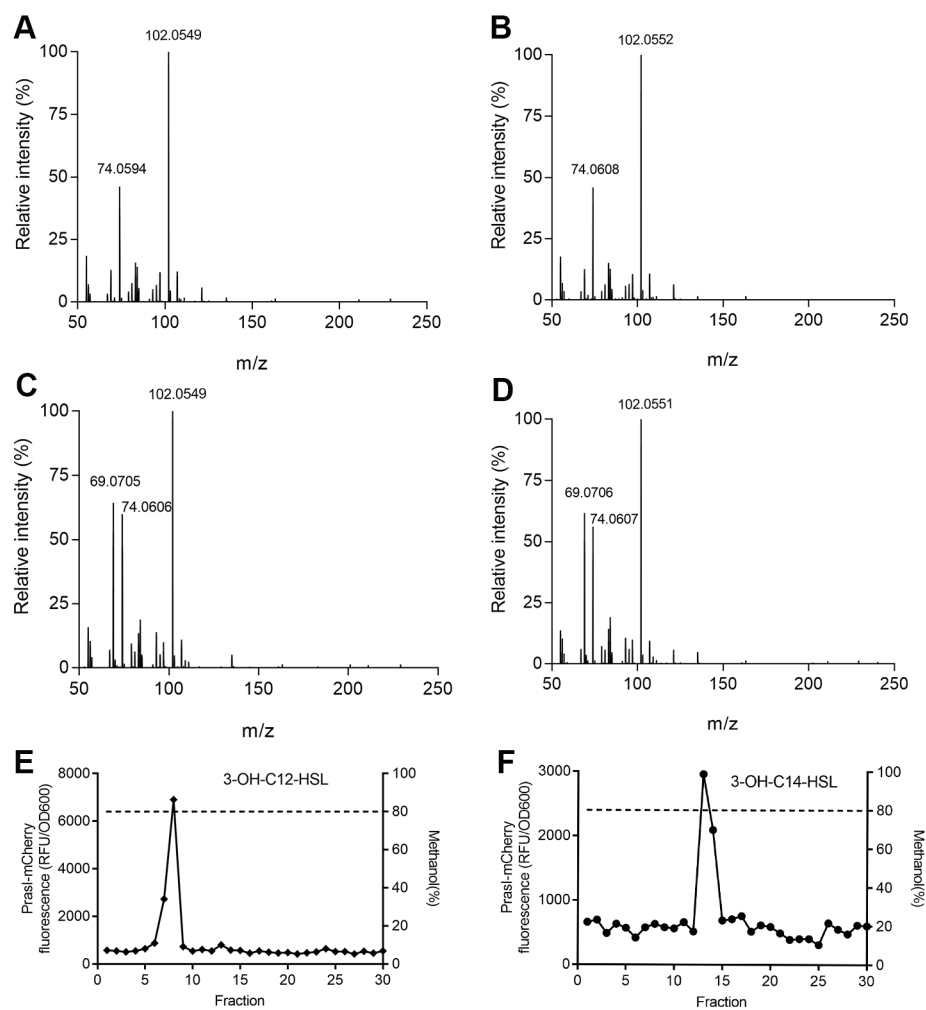

**Fig. S2. Purification and characterization of the AHL signals produced by RasI.** MS/MS daughter scan of the m/z 300 (M+H) and m/z 328 (M+H) ion from natural product fractions. (A) and (C), MS/MS daughter ion analysis of the parent ions m/z 300 (M+H) and m/z 328 (M+H) shown in Fig. 2D, respectively. (B) and (D), MS/MS daughter ion analysis of chemically synthesized 3-OH-C12-HSL and 3-OH-C14-HSL, respectively. (E) and (F), Isocratic HPLC profiles of chemically synthesized 3-OH-C12-HSL (◆) and 3-OH-C14-HSL (●), respectively, detected by reporter YJL01. The dashed line shows the methanol level in elution solvent.

**Figure S3**

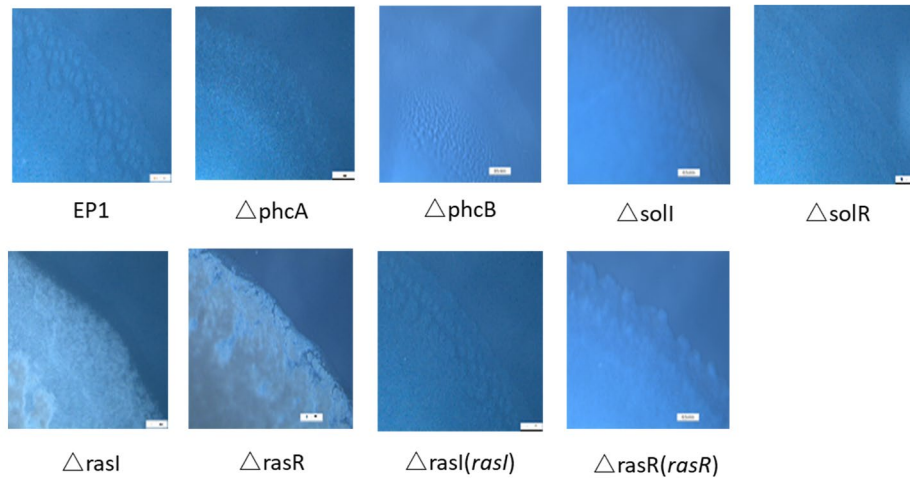

**Fig. S3. Morphology of *R. solanacearum* WT EP1 and derivatives grown on twitching motility assay plate.** Mutation of *rasI* and *rasR* caused changes in colony morphology and color. Representative images were obtained by using a Leica microsystem (Leica Microscopy, Wetzlar, Germany).

**Figure S4**

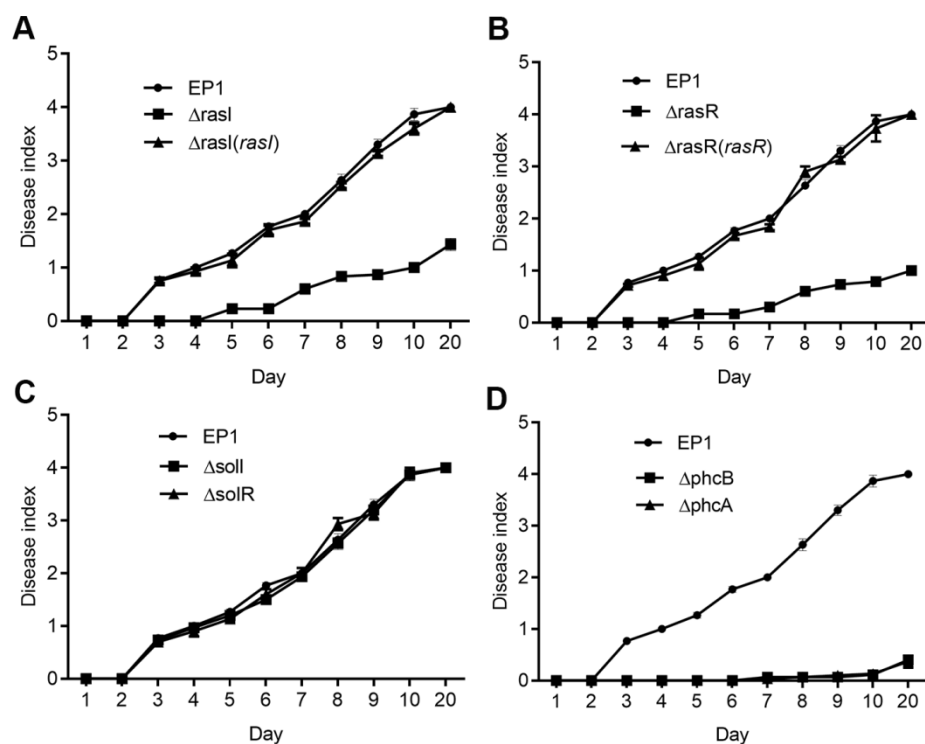

**Fig. S4. Virulence assay of *R. solanacearum* EP1 and mutants on eggplant plants.**

Plants were rated daily on a 0 to 5 disease index scale where 0=healthy and 5=100% died. Data show mean disease index ( $\pm$  SD) for four independent experiments, each containing 10 plants per treatment.

**Figure S5**

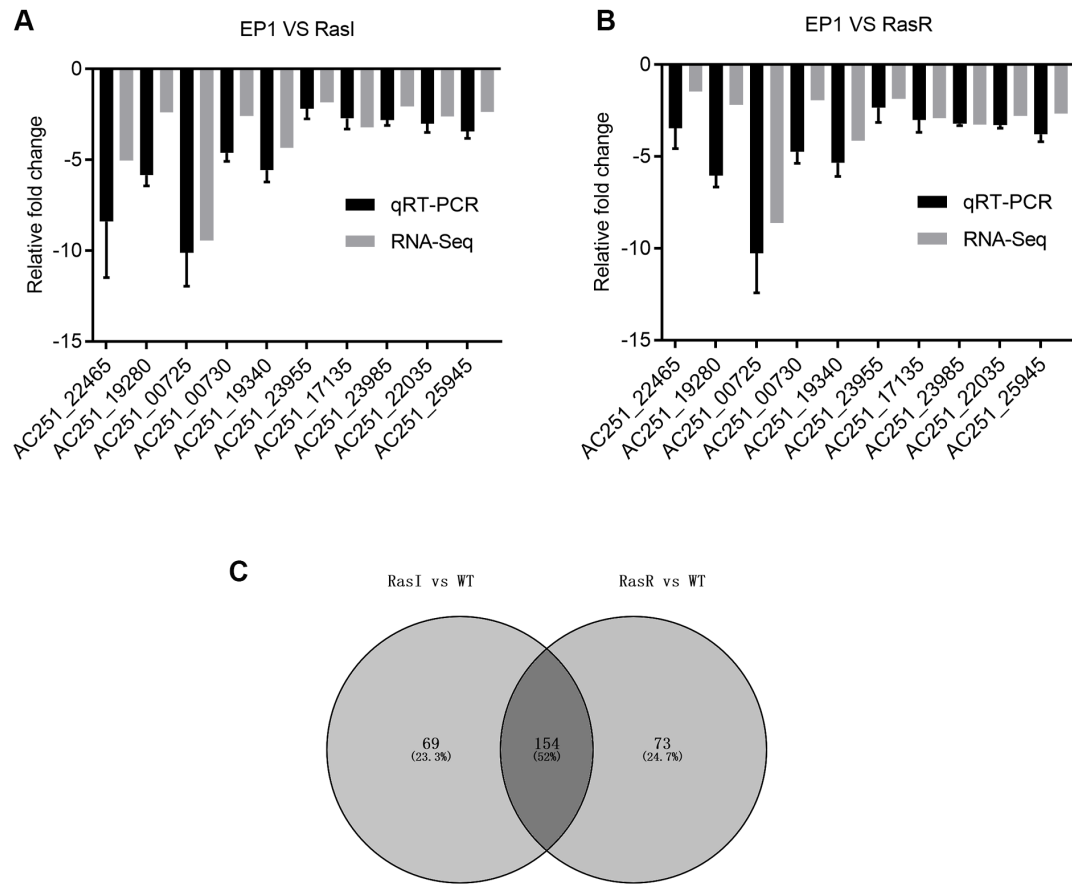

**Fig. S5. RasI and RasR regulons in *R. solanacearum* EP1.** qRT-PCR validation of RasI (A) and RasR (B) up-regulated and down-regulated genes unveiled by RNAseq analysis (Table 1). qRT-PCR data were normalized to *recA* in WT,  $\Delta$ rasR, and  $\Delta$ rasI. Error bars represent SD of three replicates. (C) Venn diagram showing overlapping and specifically regulated genes by RasI and RasR, respectively, in *R. solanacearum* strain EP1.

**Figure S6**

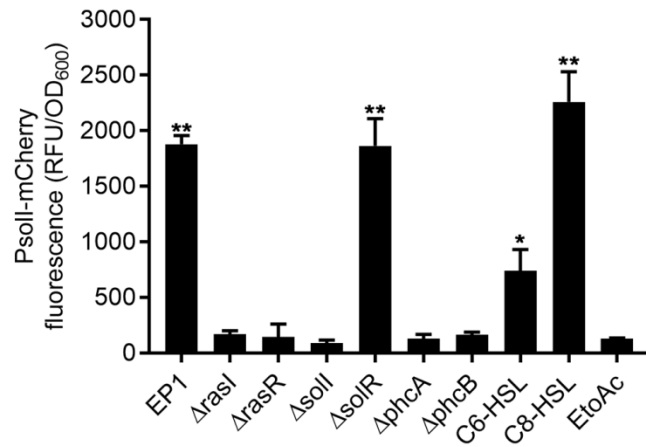

**Fig. S6.** The *soll* promoter activity in response to the culture extracts from *R. solanacearum* EP1 and mutants. Chemically synthesized C6-HSL and C8-HSL as positive controls. Same volume of ethyl acetate (EtoAc) was added as a negative control. Data are the mean, and error bars indicate the range of three biological replicates. Statistical significance: \*\*, P value < 0.01; \*, 0.01 < P value < 0.05.



SUPPLEMENTAL LITERATURE CITED

1. **McKinlay, J. B., and C. S. Harwood.** 2010. Carbon dioxide fixation as a central redox cofactor recycling mechanism in bacteria. *Proc Natl Acad Sci U S A* **107**:11669-75.
